# Supplementary material for: Substantial differences occur between canopy and ambient climate: Quantification of interactions in a greenhouse-canopy system
Source: PubMed Central journal article supplement (PMC7259515; doi:10.1371/journal.pone.0233210), 2020-05-29
Supplement: pone.0233210.s003.pdf [file pone.0233210.s003.pdf]

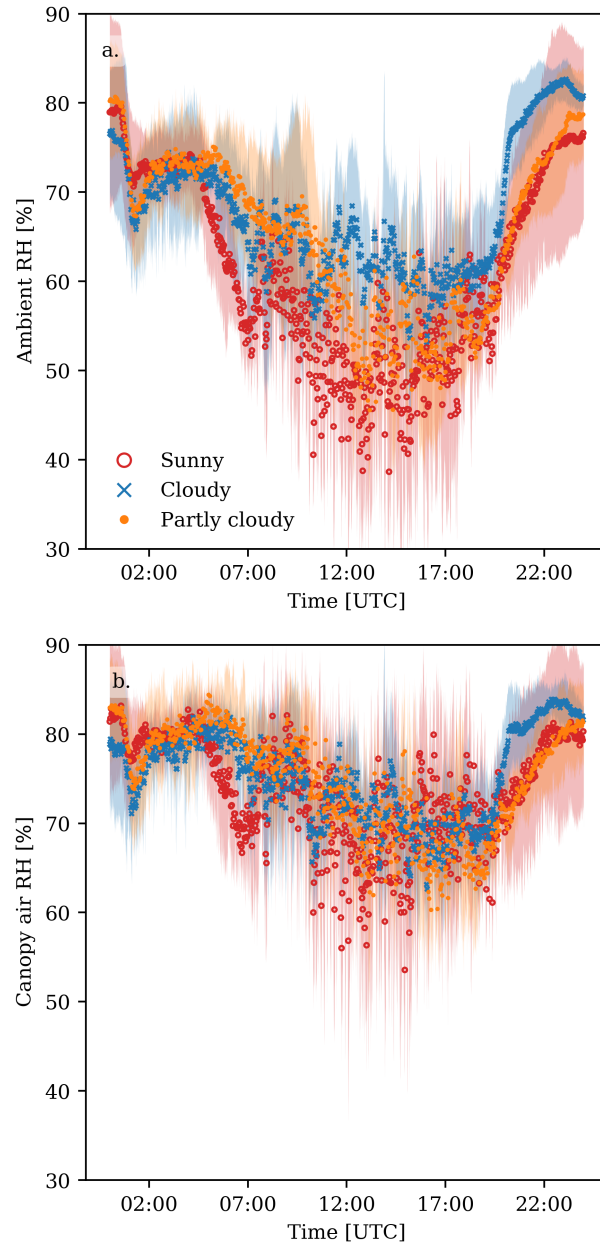

Figure S2: (a) Ambient relative humidity and (b) canopy air relative humidity (at 60 cm below the top of the canopy). Bold lines represent the average value, whereas the shaded area represents the standard deviation over the days for sunny (red), cloudy (blue) and partly cloudy days (orange).
