# Supplementary material for: Substantial differences occur between canopy and ambient climate: Quantification of interactions in a greenhouse-canopy system
Source: PubMed Central journal article supplement (PMC7259515; doi:10.1371/journal.pone.0233210), 2020-05-29
Supplement: pone.0233210.s006.pdf [file pone.0233210.s006.pdf]

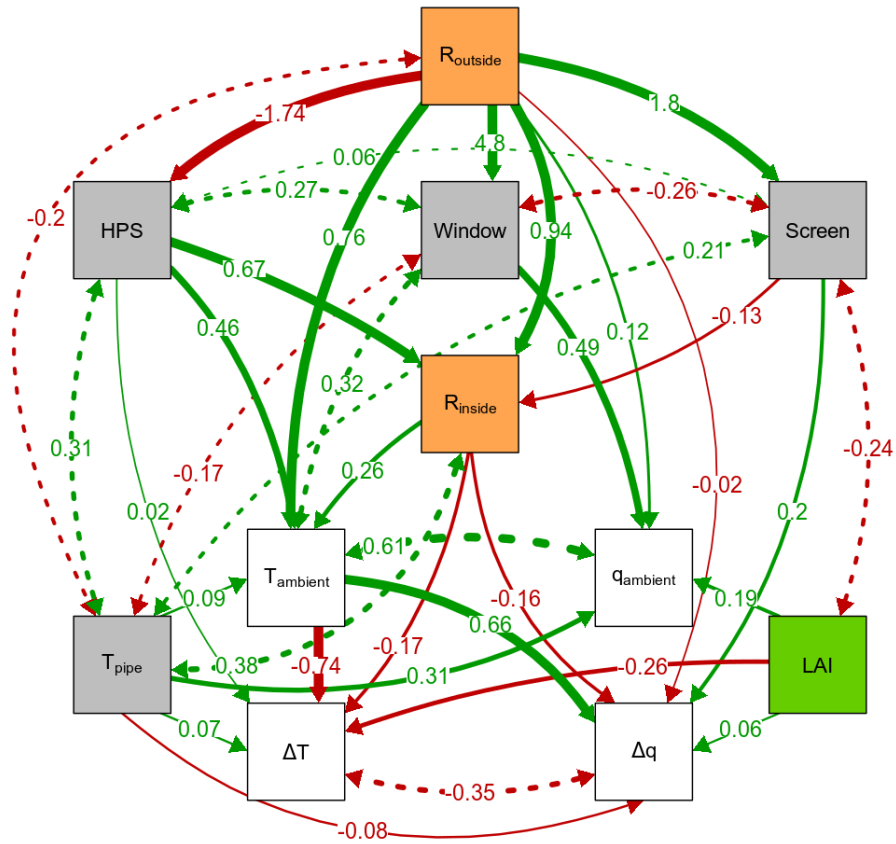

Figure S5: Causal path model for the difference between canopy and ambient temperature and absolute humidity that was consistent with the data ( $p=0.058$ ,  $df=32$ , Fisher's  $C=45.47$ ), where solid arrows show a causal relation and dashed double-headed arrows indicate correlations without a specified direction. The values denote the standardized path coefficients. The color of the boxes denote the following: *white* represents the climate variables, *grey* represents the climate control measures, *green* represents the crop and *orange* represents radiation. Abbreviations:  $R_{outside}$  is outside global radiation;  $R_{inside}$  is inside global radiation; HPS is High Pressure Sodium lamps, supplemental assimilation lighting; Window is window opening (open or closed); Screen is shading screen position (open or closed);  $T_{pipe}$  is temperature of the heating pipe; LAI is leaf area index;  $T_{ambient}$  is ambient temperature, temperature above canopy;  $q_{ambient}$  is ambient absolute humidity, absolute humidity above canopy;  $\Delta T$  is difference between ambient temperature and air temperature in the canopy;  $\Delta q$  is difference between ambient absolute humidity and absolute humidity in the canopy. Also see Table 1.
