# Supplementary material for: Substantial differences occur between canopy and ambient climate: Quantification of interactions in a greenhouse-canopy system
Source: PubMed Central journal article supplement (PMC7259515; doi:10.1371/journal.pone.0233210), 2020-05-29
Supplement: pone.0233210.s009.pdf [file pone.0233210.s009.pdf]

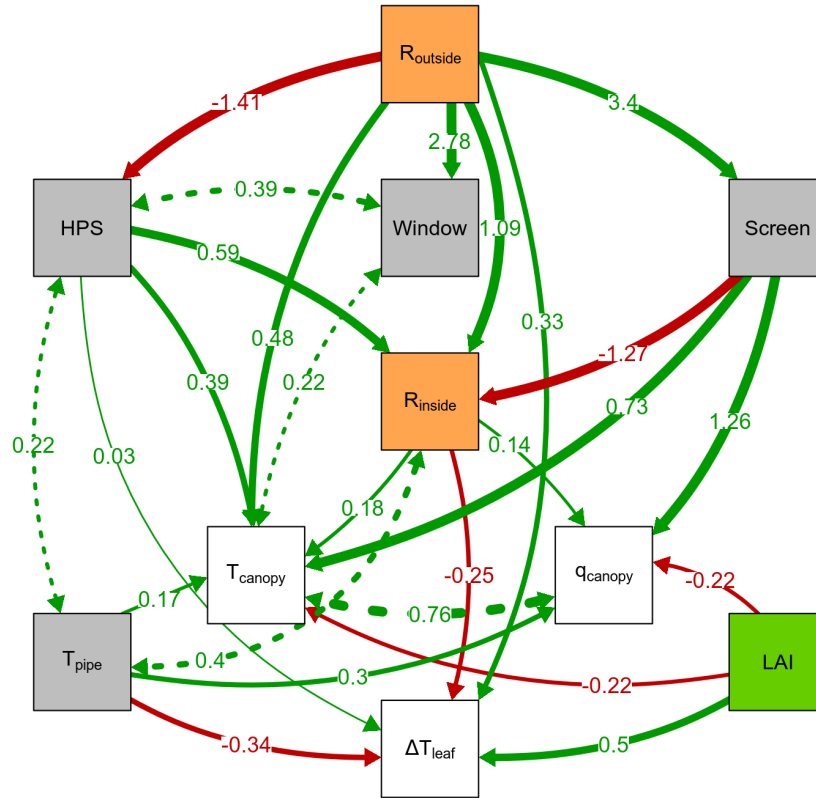

Figure S8: Causal path model for the difference between canopy air and leaf temperature that was consistent with the data ( $p=0.062$ ,  $df=32$ , Fisher's  $C=45.15$ ), where solid arrows show a causal relation and dashed double-headed arrows indicate correlations without a specified direction. The values denote the standardized path coefficients. The color of the boxes denote the following: *white* represents the climate variables, *grey* represents the climate control measures, *green* represents the crop and *orange* represents radiation. *Abbreviations:*  $R_{outside}$  is outside global radiation;  $R_{inside}$  is inside global radiation; HPS is High Pressure Sodium lamps, supplemental assimilation lighting; Window is window opening (open or closed); Screen is shading screen position (open or closed);  $T_{pipe}$  is temperature of the heating pipe; LAI is leaf area index;  $T_{ambient}$  is ambient temperature, temperature above canopy;  $q_{ambient}$  is ambient absolute humidity, absolute humidity above canopy;  $\Delta T_{leaf}$  is difference between canopy air temperature and leaf temperature. Also see Table 1.
