# Supplementary material for: Substantial differences occur between canopy and ambient climate: Quantification of interactions in a greenhouse-canopy system
Source: PubMed Central journal article supplement (PMC7259515; doi:10.1371/journal.pone.0233210), 2020-05-29
Supplement: pone.0233210.s010.pdf [file pone.0233210.s010.pdf]

## Supplementary Material

Table S1: Harvest dates of the different growing cycles (i.e. from one harvest to the next) with the number of shoots that were measured non-destructively during the growing cycle.

| Cycle | Harvest date<br>[dd-mm-yyyy] | Nr. shoots<br>[#] |
|-------|------------------------------|-------------------|
| 1     | 06-12-2016                   | 50                |
| 2     | 26-01-2017                   | 16                |
| 3     | 16-03-2017                   | 16                |
| 4     | 02-05-2017                   | 24                |
| 5     | 14-06-2017                   | 12                |
