# Supplementary material for: Substantial differences occur between canopy and ambient climate: Quantification of interactions in a greenhouse-canopy system
Source: PubMed Central journal article supplement (PMC7259515; doi:10.1371/journal.pone.0233210), 2020-05-29
Supplement: pone.0233210.s011.pdf [file pone.0233210.s011.pdf]

Table S2: Days that have been selected for analyzing the difference between the canopy and ambient climate. Crosses indicate if the days are used for the time course and/or path analysis. *LAI* is the *LAI* above the sensor that is 60 cm below the top sensor measuring ambient climate.

| Date       | Time course | path analysis | type          | <i>LAI</i> |
|------------|-------------|---------------|---------------|------------|
| 06-05-2017 |             | x             | Sunny         | 0.00       |
| 09-05-2017 |             | x             | Partly cloudy | 0.00       |
| 12-05-2017 |             | x             | Cloudy        | 0.00       |
| 15-05-2017 |             | x             | Sunny         | 0.00       |
| 19-05-2017 |             | x             | Cloudy        | 0.01       |
| 21-05-2017 |             | x             | Sunny         | 0.03       |
| 24-05-2017 |             | x             | Partly cloudy | 0.14       |
| 25-05-2017 | x           |               | Sunny         | 0.22       |
| 26-05-2017 | x           | x             | Sunny         | 0.33       |
| 27-05-2017 | x           |               | Sunny         | 0.46       |
| 28-05-2017 | x           |               | Partly cloudy | 0.59       |
| 30-05-2017 | x           | x             | Partly cloudy | 0.80       |
| 31-05-2017 |             | x             | Partly cloudy | 0.86       |
| 01-06-2017 | x           |               | Sunny         | 0.91       |
| 02-06-2017 | x           | x             | Sunny         | 0.93       |
| 06-06-2017 | x           | x             | Cloudy        | 0.97       |
| 07-06-2017 | x           | x             | Cloudy        | 0.97       |
| 08-06-2017 | x           |               | Partly cloudy | 0.97       |
| 09-06-2017 | x           | x             | Partly cloudy | 0.97       |
| 11-06-2017 |             | x             | Sunny         | 0.97       |
| 12-06-2017 | x           | x             | Cloudy        | 0.97       |
| 13-06-2017 | x           |               | Cloudy        | 0.97       |
