# Supplementary material for: Substantial differences occur between canopy and ambient climate: Quantification of interactions in a greenhouse-canopy system
Source: PubMed Central journal article supplement (PMC7259515; doi:10.1371/journal.pone.0233210), 2020-05-29
Supplement: pone.0233210.s012.pdf [file pone.0233210.s012.pdf]

Table S3: Output of the path analysis for the difference between ambient and canopy climate. Variables marked with a \* are non-directed relations and the coefficients denote the correlation.

| Response        | Independent param. | coefficient | Norm. coefficient | p-value |
|-----------------|--------------------|-------------|-------------------|---------|
| $q_{ambient}$   | LAI                | 0.33968     | 0.193             | 0.000   |
| $q_{ambient}$   | $T_{pipe}$         | 0.19389     | 0.309             | 0.000   |
| $q_{ambient}$   | $R_{outside}$      | 0.00064     | 0.115             | 0.058   |
| $q_{ambient}$   | Window             | 0.89793     | 0.494             | 0.000   |
| $T_{ambient}$   | HPS                | 1.65298     | 0.462             | 0.000   |
| $T_{ambient}$   | $R_{inside}$       | 0.01243     | 0.258             | 0.000   |
| $T_{ambient}$   | $R_{outside}$      | 0.00832     | 0.760             | 0.000   |
| $T_{ambient}$   | $T_{pipe}$         | 0.10689     | 0.087             | 0.001   |
| $\Delta T$      | $T_{ambient}$      | -0.16197    | -0.736            | 0.000   |
| $\Delta T$      | LAI                | -0.15274    | -0.256            | 0.000   |
| $\Delta T$      | $R_{inside}$       | -0.00230    | -0.171            | 0.000   |
| $\Delta T$      | HPS                | 0.04223     | 0.021             | 0.280   |
| $\Delta T$      | $T_{pipe}$         | 0.01219     | 0.072             | 0.042   |
| $\Delta q$      | LAI                | 0.03093     | 0.063             | 0.003   |
| $\Delta q$      | $R_{inside}$       | -0.00108    | -0.158            | 0.000   |
| $\Delta q$      | $R_{outside}$      | -0.00003    | -0.023            | 0.685   |
| $\Delta q$      | $T_{ambient}$      | 0.09337     | 0.658             | 0.000   |
| $\Delta q$      | $T_{pipe}$         | -0.01395    | -0.080            | 0.000   |
| $\Delta q$      | Screen             | 0.10386     | 0.205             | 0.000   |
| $R_{inside}$    | $R_{outside}$      | 0.21470     | 0.944             | 0.000   |
| $R_{inside}$    | HPS                | 49.52828    | 0.667             | 0.000   |
| $R_{inside}$    | Screen             | -9.81450    | -0.132            | 0.039   |
| Window          | $R_{outside}$      | 0.01469     | 4.796             | 0.000   |
| Screen          | $R_{outside}$      | 0.00552     | 1.803             | 0.000   |
| HPS             | $R_{outside}$      | -0.00533    | -1.741            | 0.000   |
| $\Delta T^*$    | $\Delta q^*$       | -0.34830    | -0.348            | 0.000   |
| $T_{ambient}^*$ | $q_{ambient}^*$    | 0.60700     | 0.607             | 0.000   |
| $T_{ambient}^*$ | Window             | 0.32450     | 0.324             | 0.000   |
| $T_{pipe}^*$    | $R_{outside}^*$    | -0.20410    | -0.204            | 0.000   |
| $T_{pipe}^*$    | $R_{inside}^*$     | 0.37590     | 0.376             | 0.000   |
| Screen*         | LAI*               | -0.24380    | -0.244            | 0.000   |
| Screen*         | $T_{pipe}^*$       | 0.21380     | 0.214             | 0.000   |
| Screen*         | HPS*               | 0.01710     | 0.017             | 0.382   |
| Window*         | $T_{pipe}^*$       | -0.17190    | -0.172            | 0.001   |
| Window*         | Screen*            | -0.25590    | -0.256            | 0.000   |
| Window*         | HPS*               | 0.24630     | 0.246             | 0.000   |
| $T_{pipe}^*$    | HPS*               | 0.35680     | 0.357             | 0.000   |
