# Supplementary material for: Substantial differences occur between canopy and ambient climate: Quantification of interactions in a greenhouse-canopy system
Source: PubMed Central journal article supplement (PMC7259515; doi:10.1371/journal.pone.0233210), 2020-05-29
Supplement: pone.0233210.s013.pdf [file pone.0233210.s013.pdf]

Table S4: Output of the path analysis for leaf temperature. Variables marked with a \* are non-directed relations and the coefficients denote the correlation.

| Response          | Independent param. | coefficient | Norm. coefficient | p-value |
|-------------------|--------------------|-------------|-------------------|---------|
| $\Delta T_{leaf}$ | LAI                | 1.18315     | 0.501             | 0.000   |
| $\Delta T_{leaf}$ | $R_{inside}$       | -0.00180    | -0.250            | 0.000   |
| $\Delta T_{leaf}$ | $R_{outside}$      | 0.00051     | 0.328             | 0.000   |
| $\Delta T_{leaf}$ | HPS                | 0.12609     | 0.030             | 0.006   |
| $\Delta T_{leaf}$ | $T_{pipe}$         | -0.05753    | -0.336            | 0.000   |
| $T_{canopy}$      | HPS                | 1.10446     | 0.391             | 0.000   |
| $T_{canopy}$      | $R_{inside}$       | 0.00695     | 0.185             | 0.002   |
| $T_{canopy}$      | $R_{outside}$      | 0.00488     | 0.483             | 0.000   |
| $T_{canopy}$      | $T_{pipe}$         | 0.17430     | 0.170             | 0.000   |
| $T_{canopy}$      | Screen             | 2.06099     | 0.729             | 0.004   |
| $T_{canopy}$      | LAI                | -4.03524    | -0.217            | 0.000   |
| $q_{canopy}$      | LAI                | -0.00330    | -0.216            | 0.000   |
| $q_{canopy}$      | $T_{pipe}$         | 0.00026     | 0.305             | 0.000   |
| $q_{canopy}$      | $R_{inside}$       | 0.00000     | 0.135             | 0.009   |
| $q_{canopy}$      | Screen             | 0.00292     | 1.257             | 0.000   |
| $R_{inside}$      | $R_{outside}$      | 0.29247     | 1.089             | 0.000   |
| $R_{inside}$      | HPS                | 44.05805    | 0.587             | 0.000   |
| $R_{inside}$      | Screen             | -95.37331   | -1.270            | 0.000   |
| HPS               | $R_{outside}$      | -0.00504    | -1.410            | 0.000   |
| Screen            | $R_{outside}$      | 0.01214     | 3.396             | 0.000   |
| Window            | $R_{outside}$      | 0.00995     | 2.783             | 0.001   |
| $T_{canopy}^*$    | Window*            | 0.22000     | 0.220             | 0.006   |
| $T_{canopy}^*$    | $q_{canopy}^*$     | 0.76160     | 0.762             | 0.000   |
| HPS*              | Window*            | 0.39440     | 0.394             | 0.000   |
| $T_{pipe}^*$      | $R_{inside}^*$     | 0.40020     | 0.400             | 0.000   |
| $T_{pipe}^*$      | HPS*               | 0.22080     | 0.221             | 0.006   |
